# Supplementary material for: Rapid separation and purification of lead halide perovskite quantum dots through differential centrifugation in nonpolar solvent
Source: Royal Society of Chemistry journal article supplement (doi:10.1039/d1ra04578d), 2021-01-01
Supplement: d1ra04578d1.pdf [file d1ra04578d1.pdf]

Supplementary Information for

# Rapid Separation and Purification of Lead Halide Perovskite Quantum Dots through Centrifugation in Nonpolar Solvent

*Shu Zhou*<sup>†,‡,\*</sup>

<sup>†</sup> *School of Materials, Sun Yat-sen University, Guangzhou 510275, China*

<sup>‡</sup> *Department of Physics, The Chinese University of Hong Kong, New Territories, Hong Kong*

E-mail: [\\*zhoush67@mail.sysu.edu.cn](mailto:*zhoush67@mail.sysu.edu.cn)

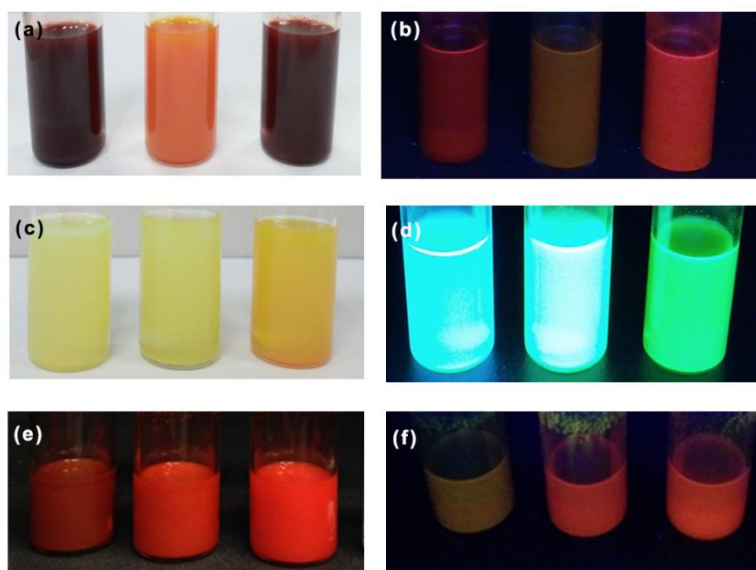

**Figure S1.** Crude solutions (from left to right, toluene, hexane, chlorobenzene) of (a,b) MAPbI<sub>3</sub>, (c,d) MAPbBr<sub>3</sub> and (e,f) FAPbI<sub>3</sub> perovskite quantum dots (QDs) under ambient light and UV light.

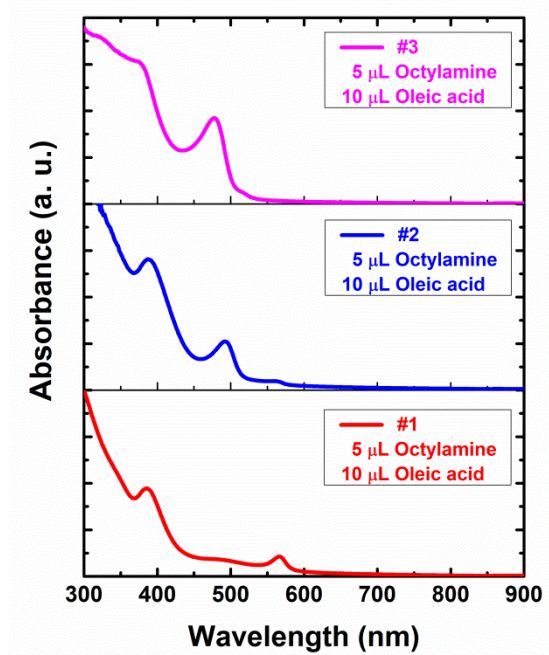

**Figure S2.** Absorption spectra of crude solutions of FAPbI<sub>3</sub> perovskite QDs.

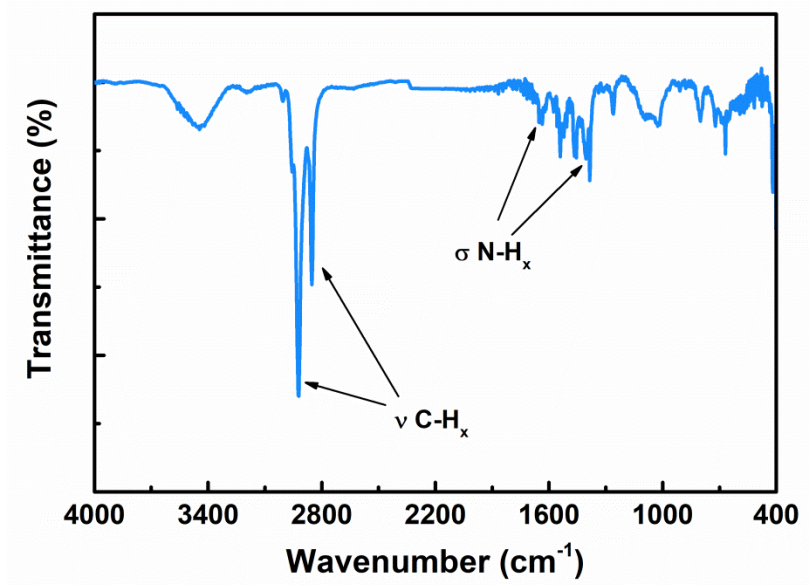

**Figure S3.** FTIR spectrum of halide perovskite QDs showing extensive alky termination of the QD surface.

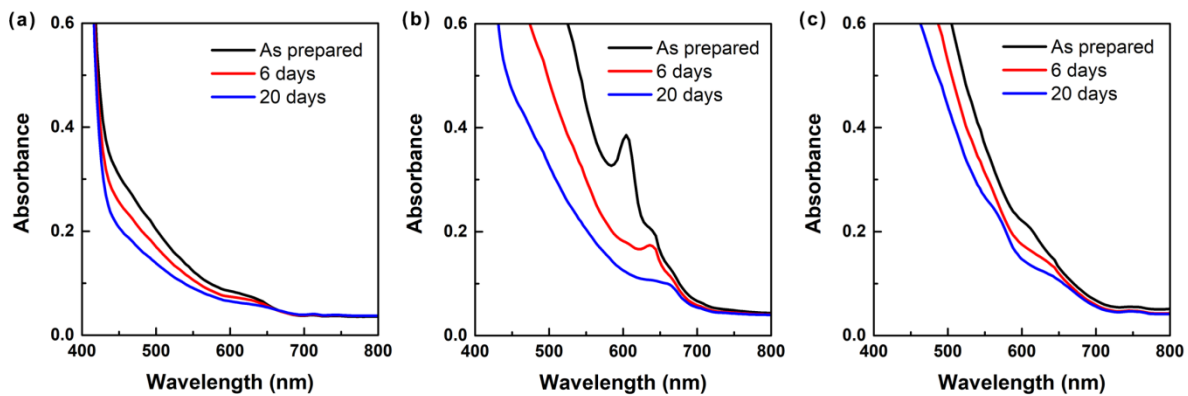

**Figure S4.** UV-vis absorption of (a) toluene, (b) chlorobenzene and (c) hexane solutions of MAPbI<sub>3</sub> perovskite QDs and the same solutions after stored in air for 6 days and 20 days, respectively.

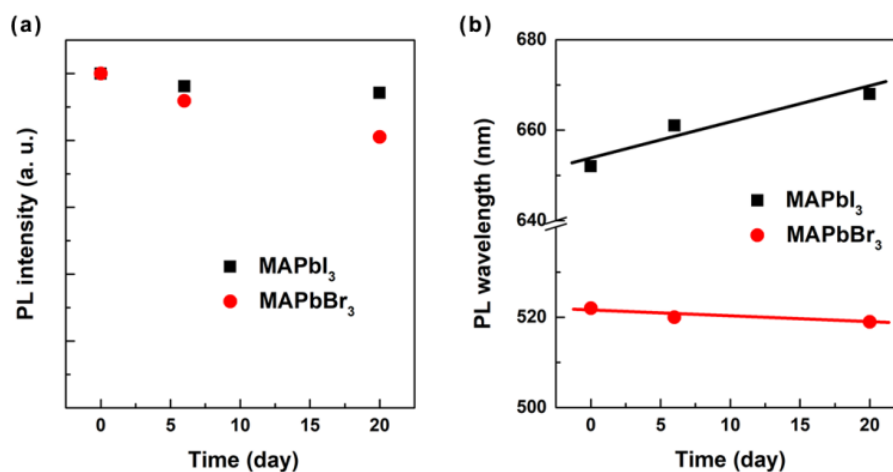

**Figure S5.** (a) Intensity profile and (b) shift of the PL peak for hexane solutions of MAPbI<sub>3</sub> and MAPbBr<sub>3</sub> QDs.

As the storage time increases it can be seen that the PL intensity drops by 6% for MAPbI<sub>3</sub> hexane solution which is smaller than that of MAPbBr<sub>3</sub> hexane solution (19%). By contrast, the PL wavelength of MAPbI<sub>3</sub> hexane solution shifts from 652 nm to 668 nm, which is much larger than that of MAPbBr<sub>3</sub> hexane solution (from 522 nm to 519 nm). Thus, it may be not accurate to state that the stability of MAPbI<sub>3</sub> hexane solution is better than that of MAPbBr<sub>3</sub> hexane solution.

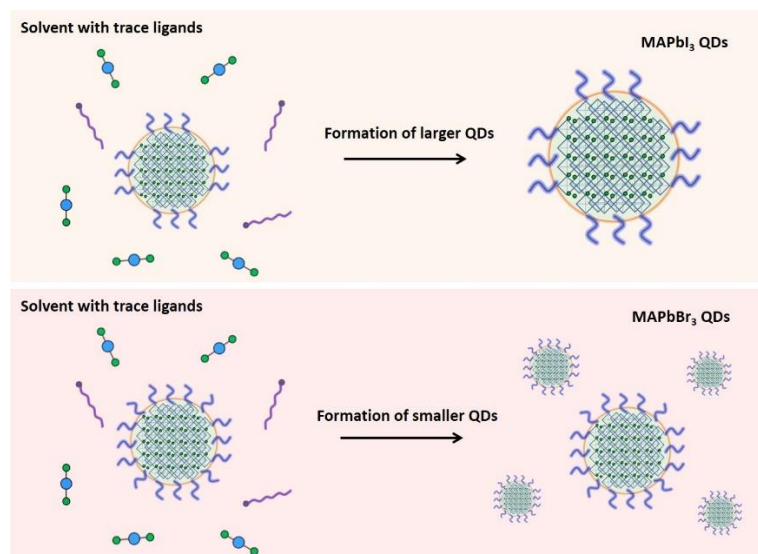

**Figure S6.** Schematic showing the different transformation processes of MAPbI<sub>3</sub> and MAPbBr<sub>3</sub> QDs in the solvents during the course of storage in air.

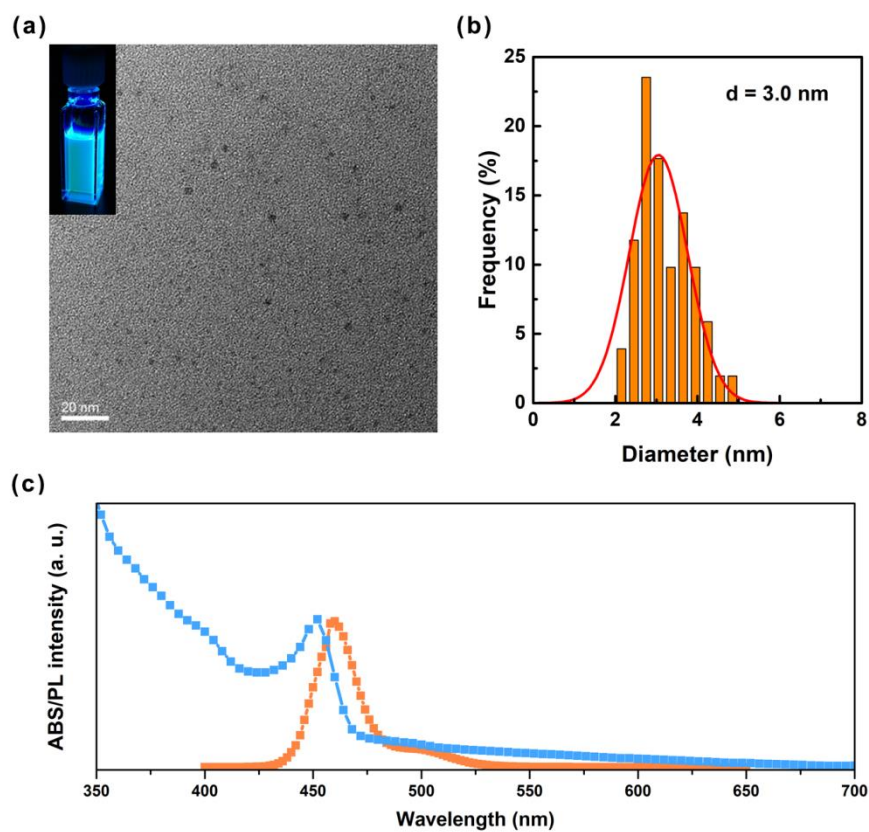

**Figure S7.** (a-b) TEM image and the corresponding size analysis of monodisperse CsPbBr<sub>3</sub> perovskite QDs obtained by differential centrifugation. (c) UV-vis absorption and PL spectra of CsPbBr<sub>3</sub> QD solution after storing in air for 6 days.



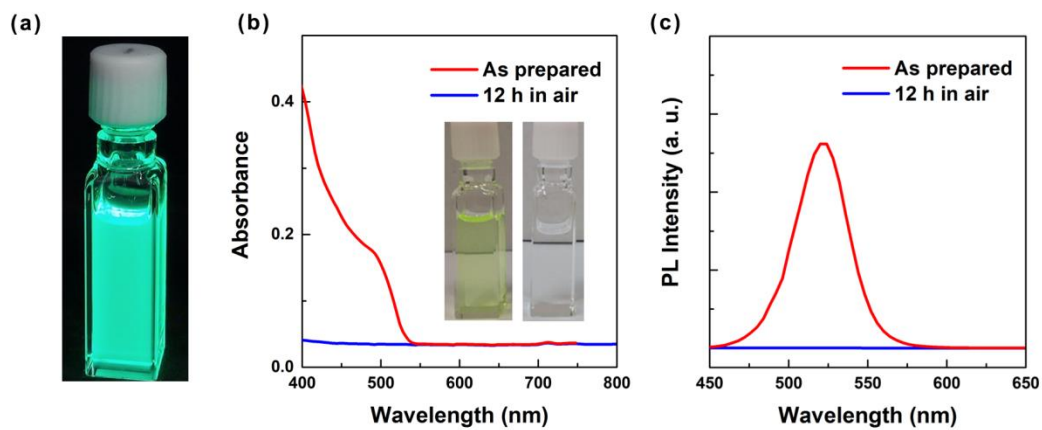

**Figure S8.** (a) Image of hexane solution of FAPbBr<sub>3</sub> perovskite QDs under UV light. (b) UV-vis absorption and (c) PL spectra of FAPbBr<sub>3</sub> perovskite QDs solution and the same solution after 12 h storage in air. Inset shows images of hexane solution of FAPbBr<sub>3</sub> perovskite QDs and the same solution after 12 h storage in air.

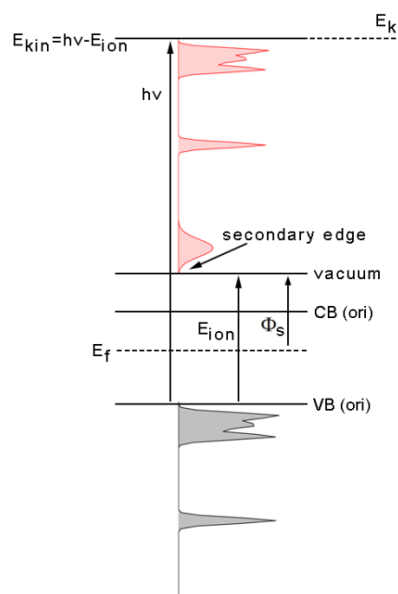

**Figure S9.** Schematic of photoemission spectroscopy of the perovskite QD samples. Free electrons with certain kinetic energy ( $E_{kin}$ ) generated by external photoelectric effect depends on the exciting photon energy ( $h\nu$ ), the ionization energy ( $E_{ion}$ ) (or the work function ( $\Phi_s$ )) of the sample, the binding energy ( $E_b$ ) of the excited electron, and inelastic scattering processes in the sample.

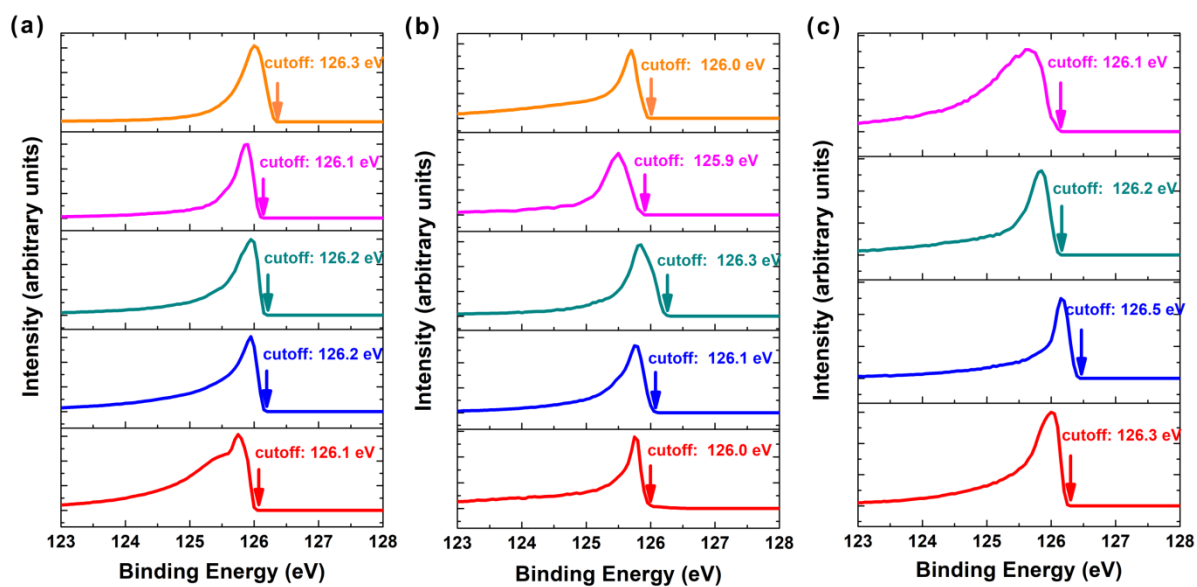

**Figure S10.** UPS spectra of MAPbI<sub>3</sub>, MAPbBr<sub>3</sub> and CsPbBr<sub>3</sub> perovskite QDs with different sizes. The location of Fermi level can be obtained from the secondary cutoff spectra.

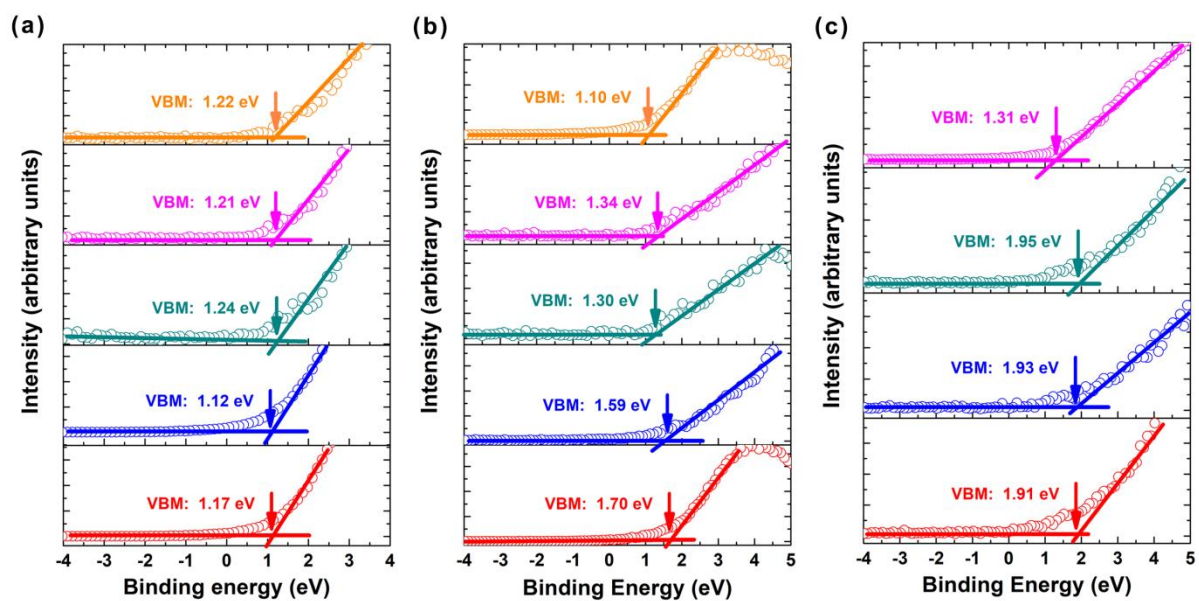

**Figure S11.** UPS spectra of (a) MAPbI<sub>3</sub>, (b) MAPbBr<sub>3</sub> and (c) CsPbBr<sub>3</sub> perovskite QDs with different sizes. The location of HOMO level can be determined from the valence-band maximum (VBM) of the valence band spectra.
